# Supplementary material
Source: Springer Nature journal article supplement (https://www.springermedizin.de/resource/supplementary/12885_2009_1736_MOESM4_ESM.pdf/9472812)

**D1**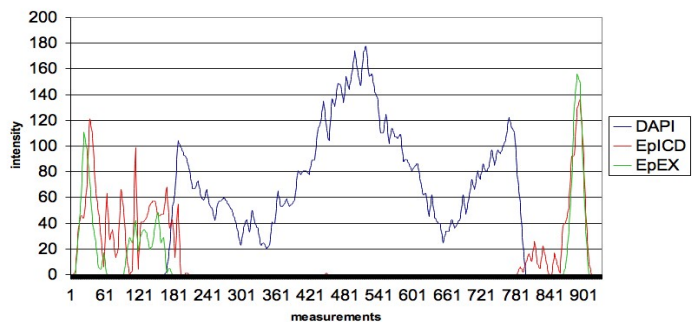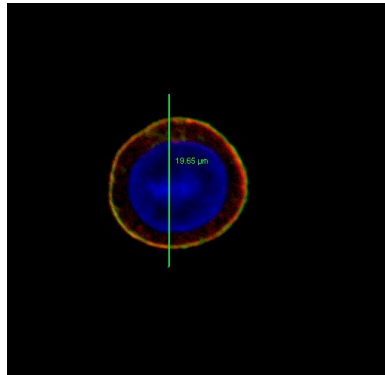**D2**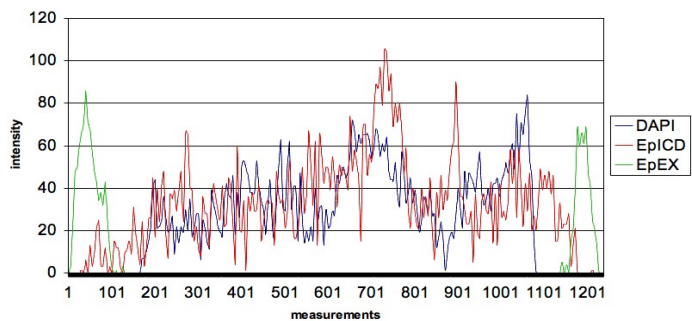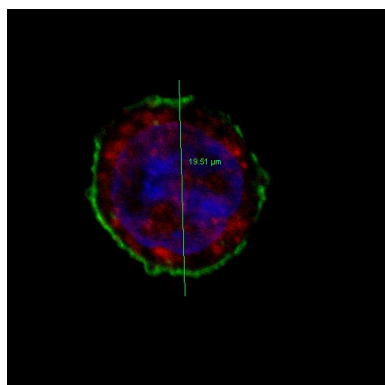**D3**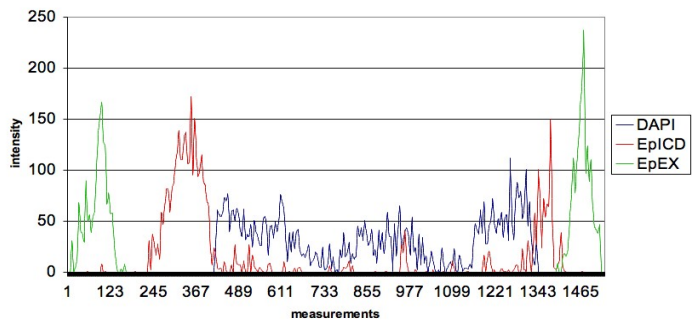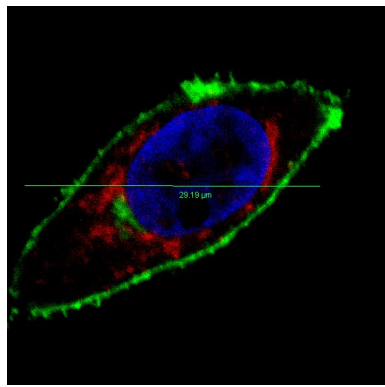

Supplement: MOESM4 [file 9472812]
